# Supplementary material
Source: PubMed Central journal article supplement (PMC3562731)

LNCaP

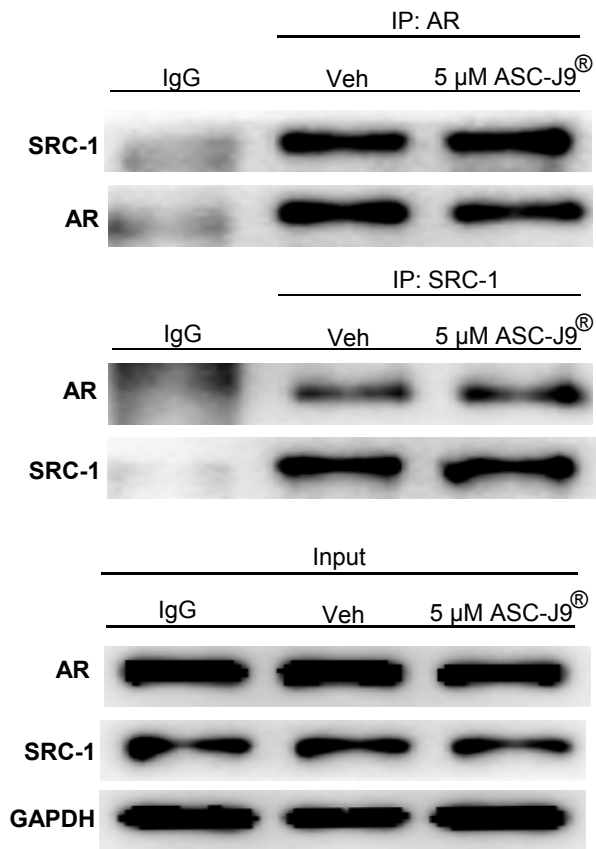

Supplement: mmc1.pdf [file mmc1.pdf]

A

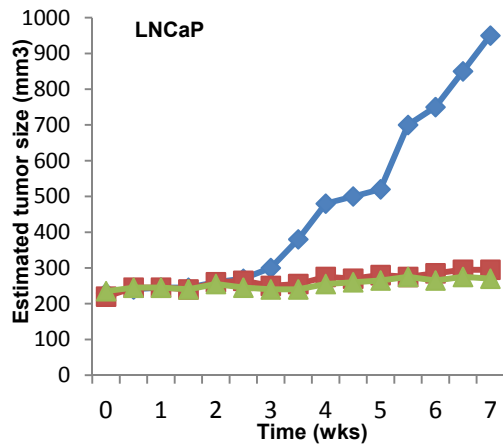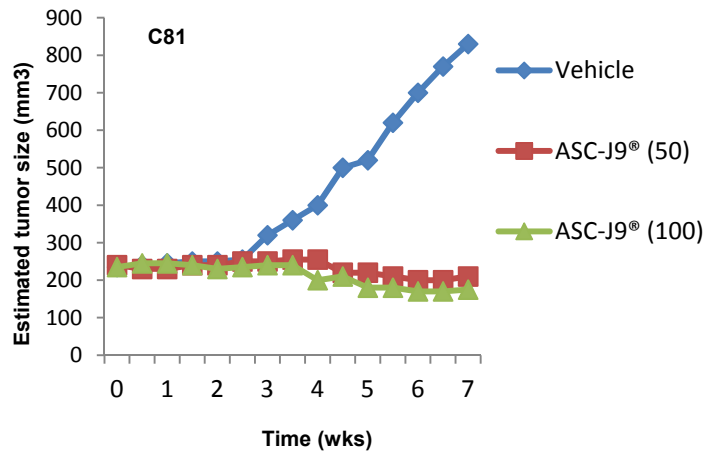

B

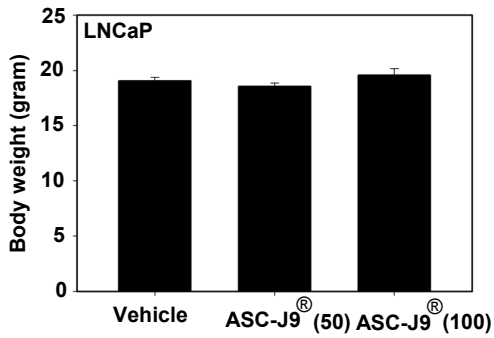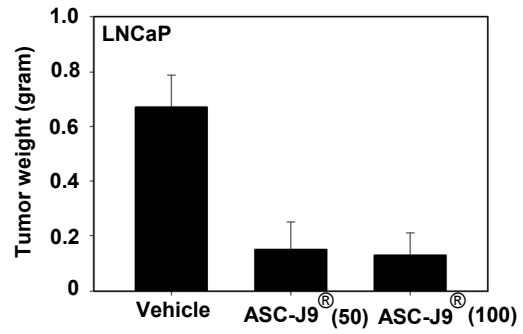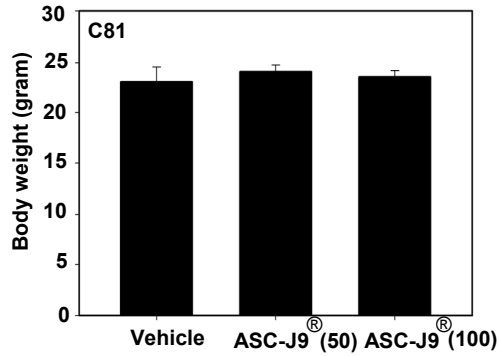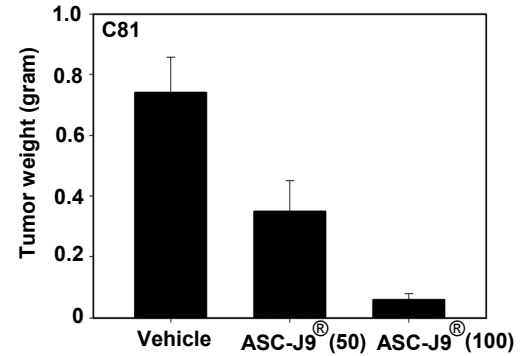

Supplement: mmc10.pdf [file mmc10.pdf]

A

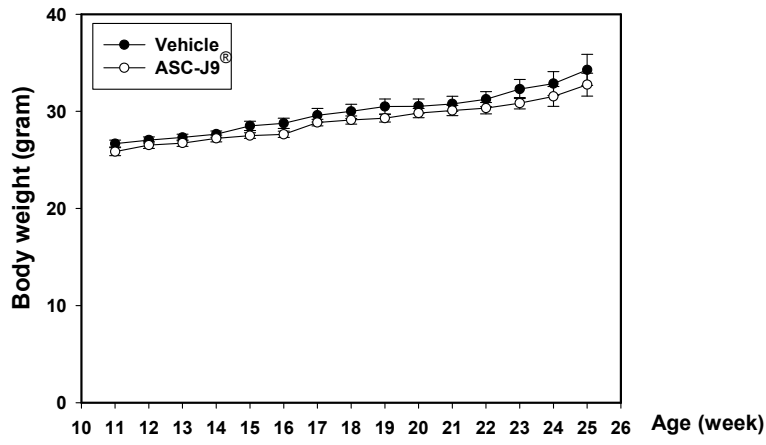

B

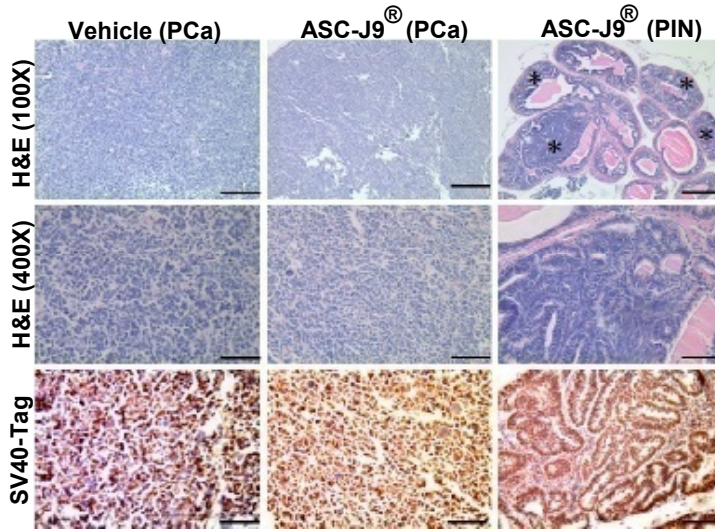

C

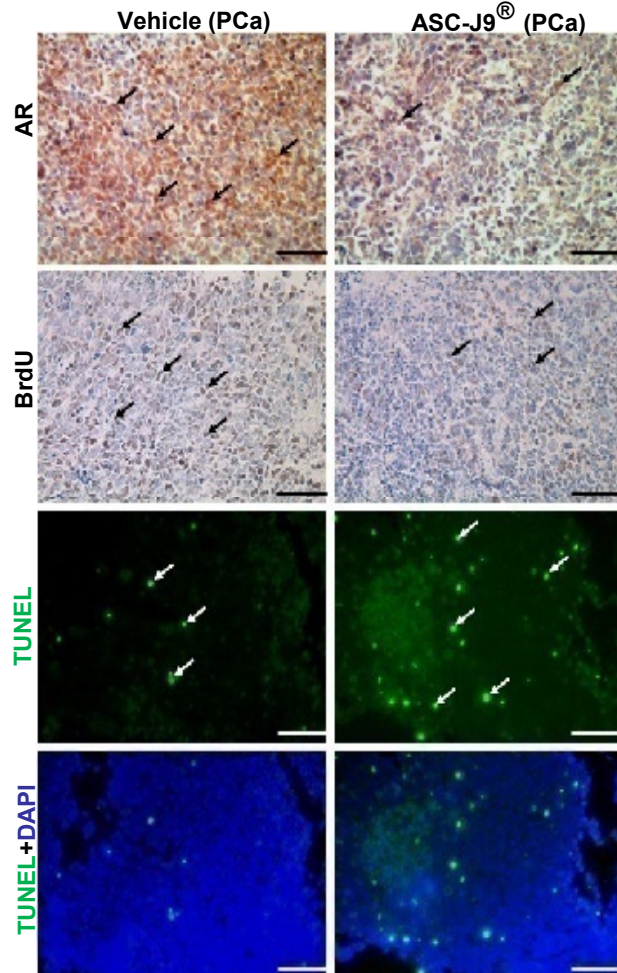

D

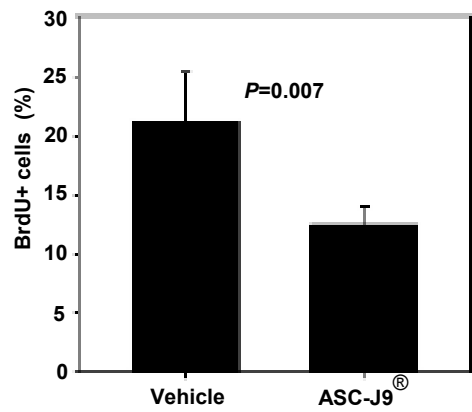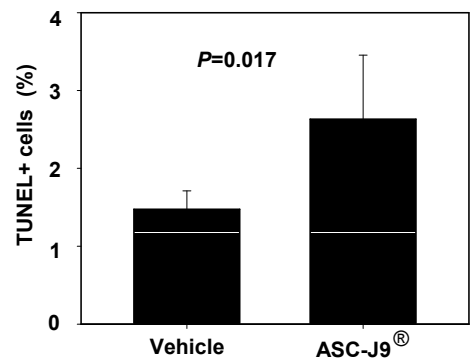

Supplement: mmc11.pdf [file mmc11.pdf]

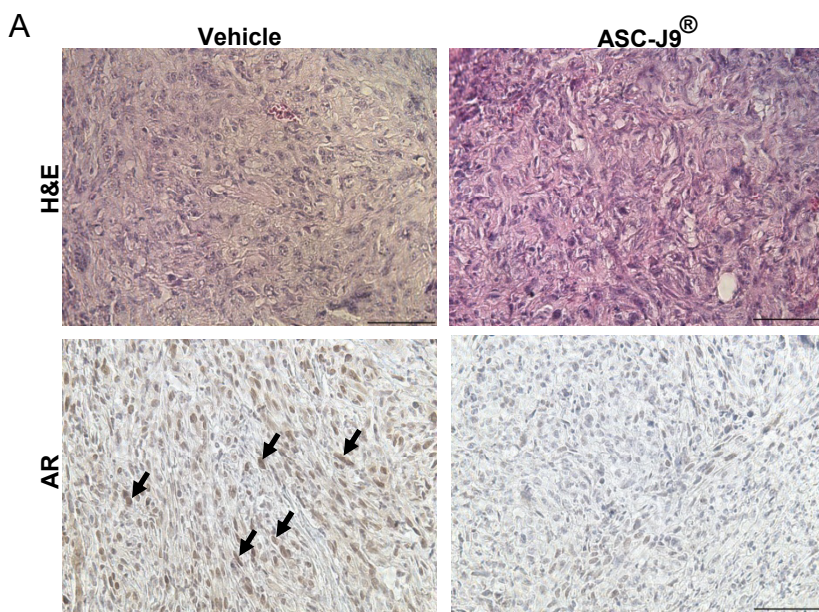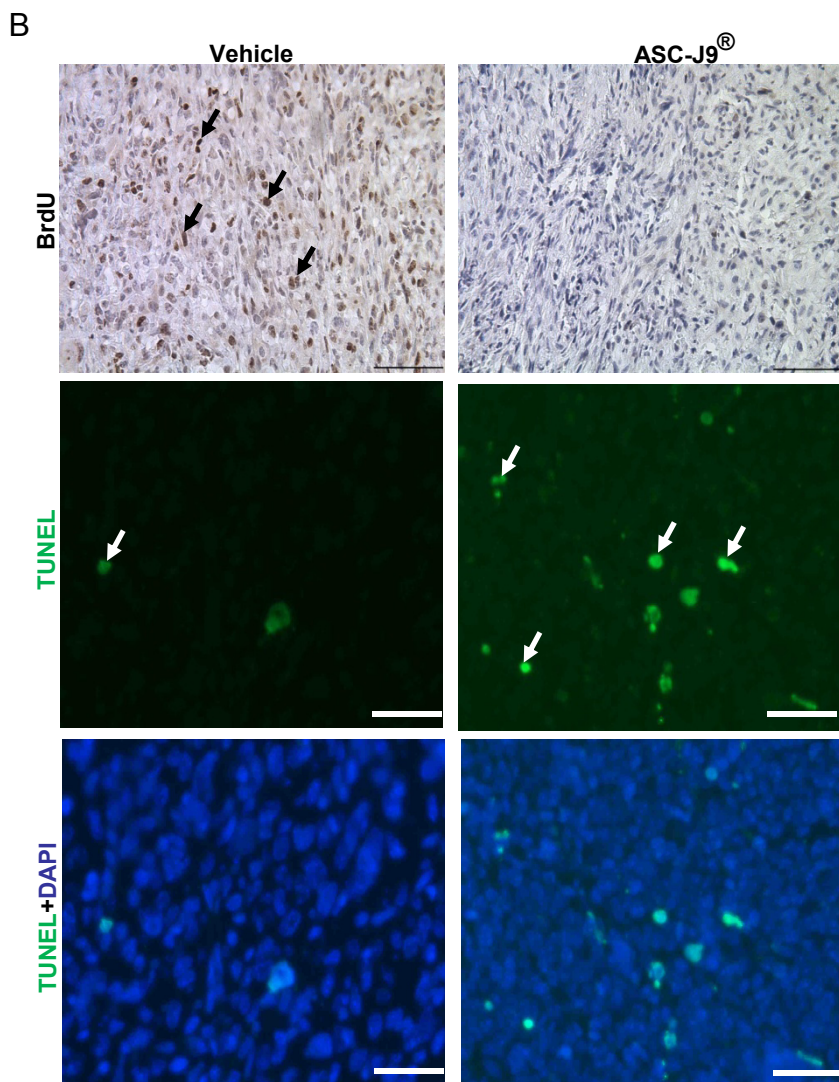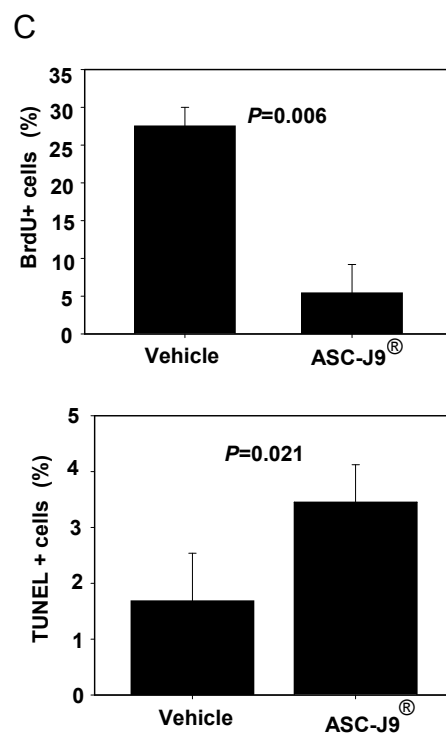

Supplement: mmc12.pdf [file mmc12.pdf]

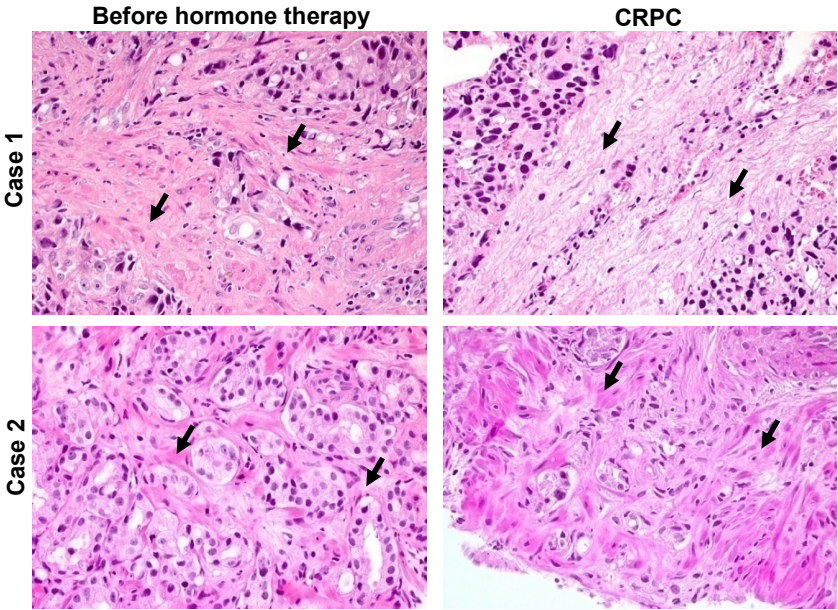

Supplement: mmc13.pdf [file mmc13.pdf]

A

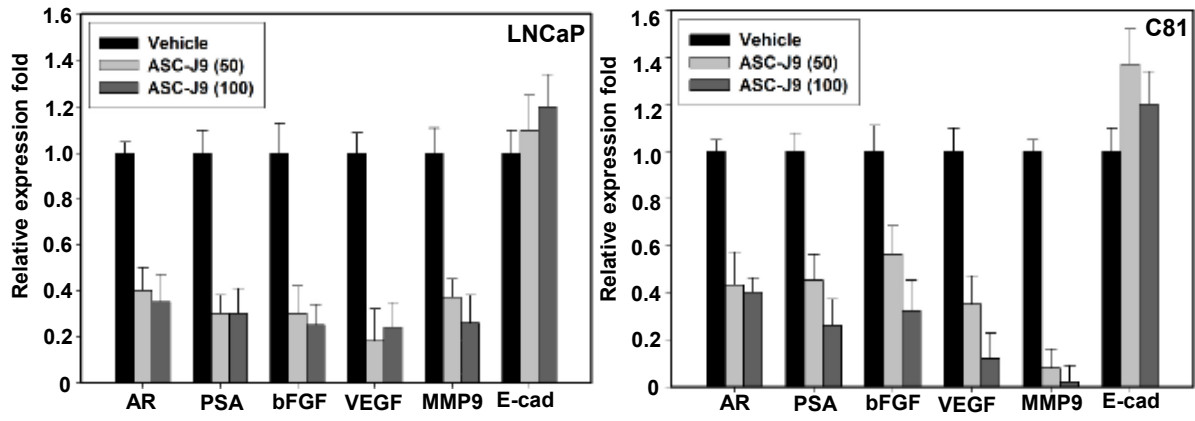

B

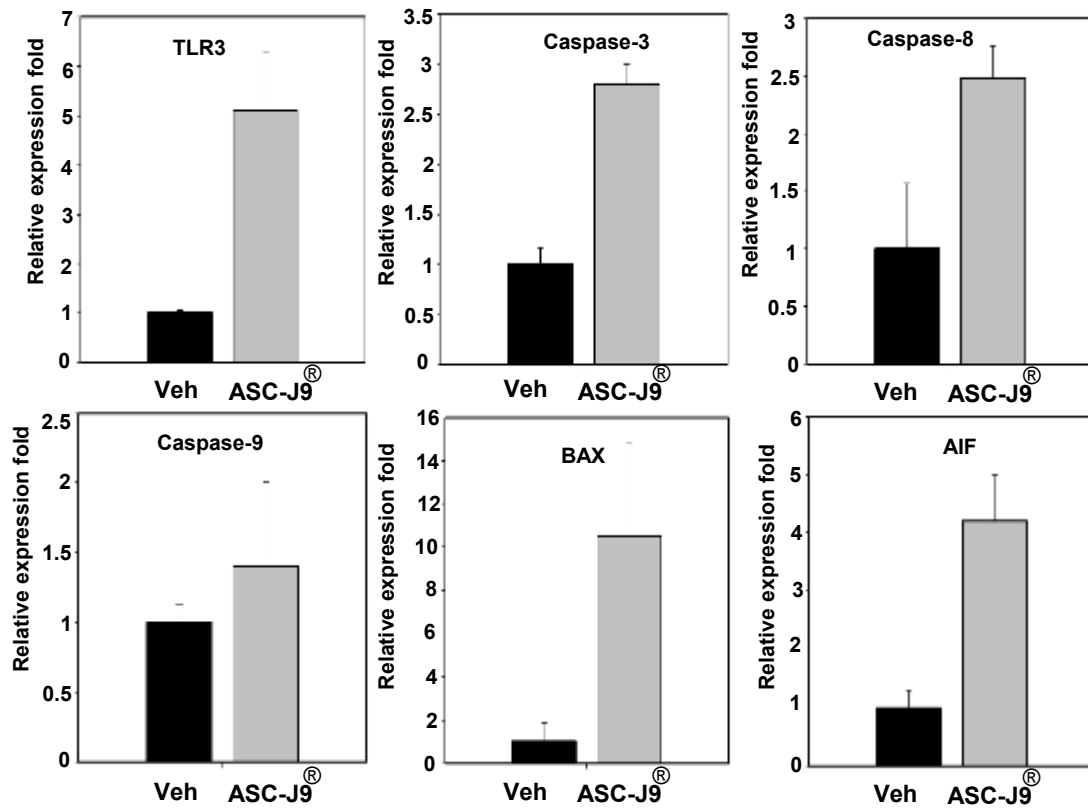

C

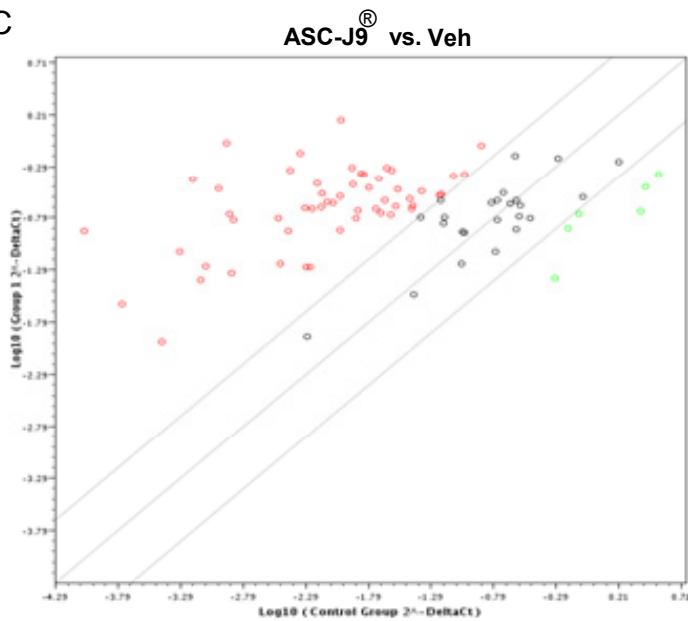

Supplement: mmc14.pdf [file mmc14.pdf]

A

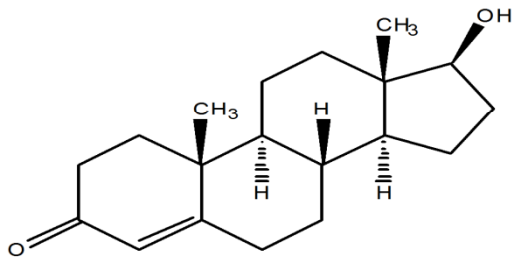

**DHT**

B

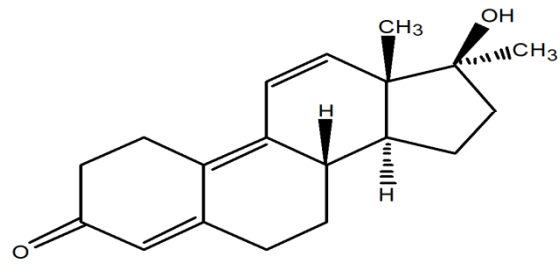

**R1881**

C

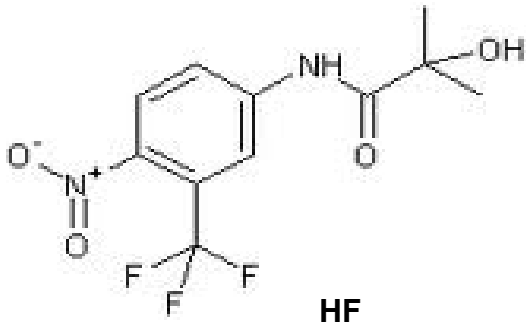

**HF**

D

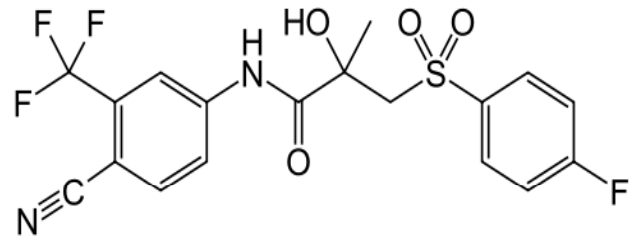

**Bicalutamide®**

E

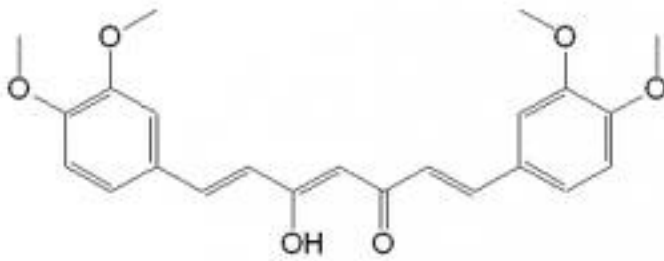

**ASC-J9®**

F

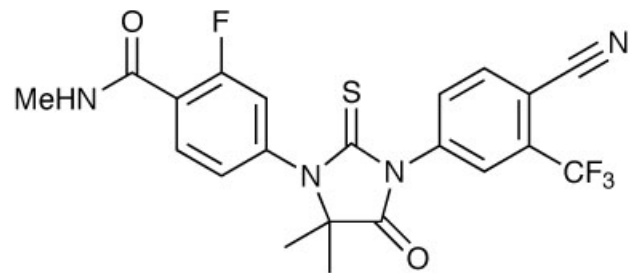

**MDV3100**

Supplement: mmc2.pdf [file mmc2.pdf]

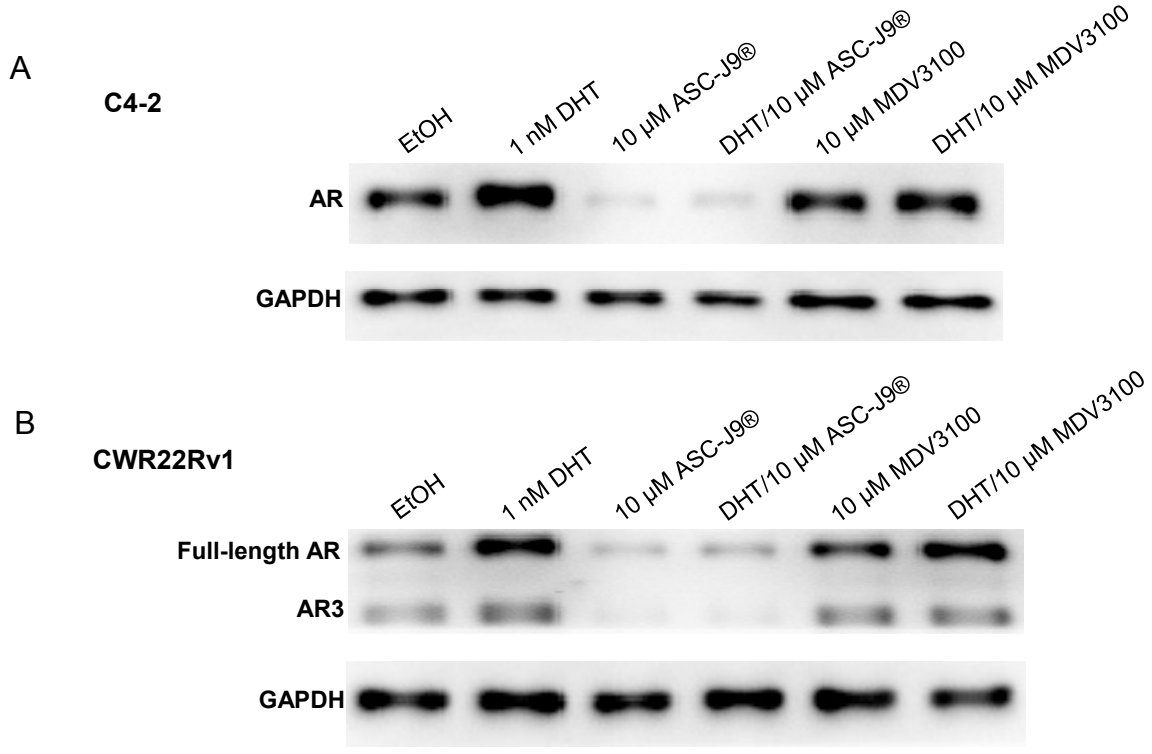

Supplement: mmc3.pdf [file mmc3.pdf]

CWR22Rv1

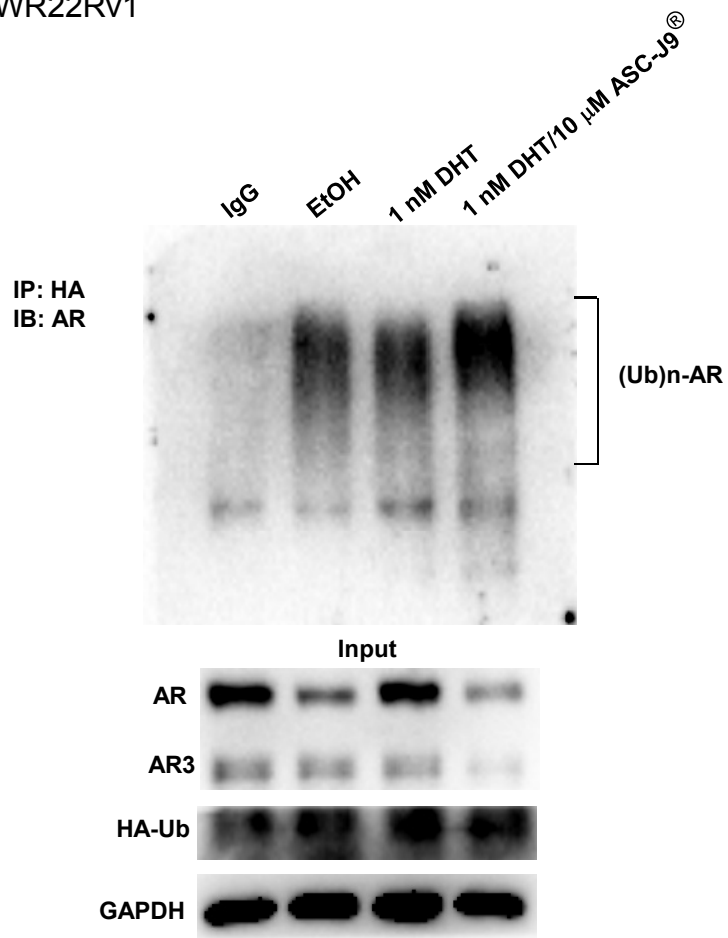

Supplement: mmc4.pdf [file mmc4.pdf]

A C4-2

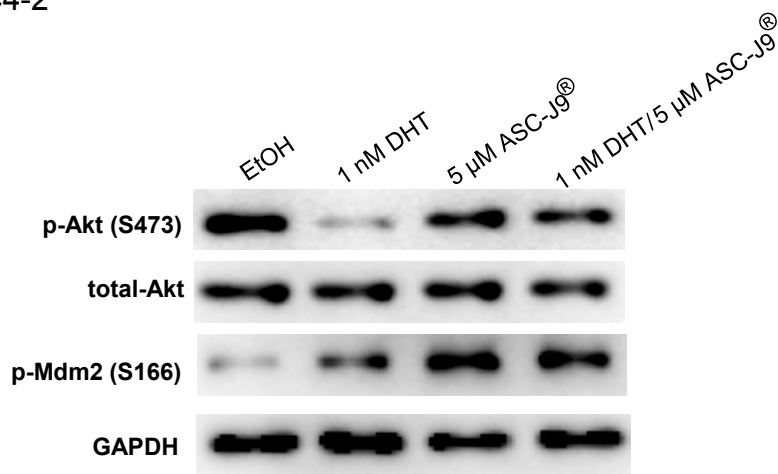

B CWR22Rv1

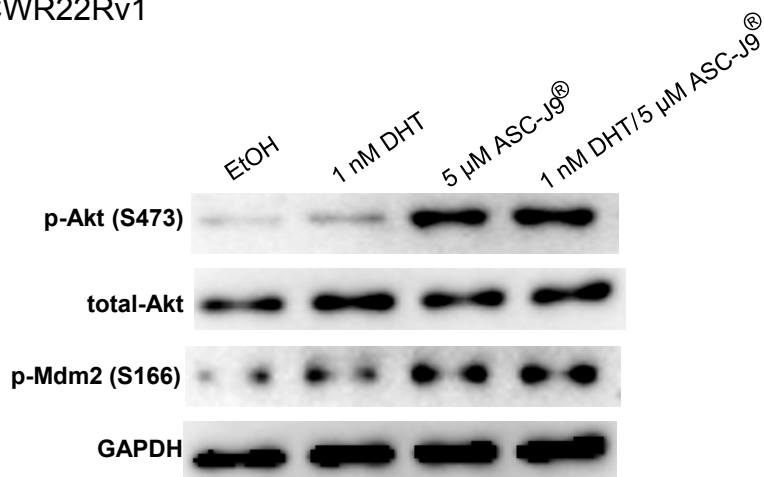

Supplement: mmc5.pdf [file mmc5.pdf]

CWR22Rv1

|                                 |   |   |   |   |   |
|---------------------------------|---|---|---|---|---|
| 1 nM DHT                        | + | + | + | + | + |
| 7.5 $\mu$ M ASC-J9 <sup>®</sup> | - | + | + | + | + |
| dAkt                            | - | - | - | + | + |
| Wt Mdm2                         | + | + | - | + | - |
| S166/186A Mdm2                  | - | - | + | - | + |

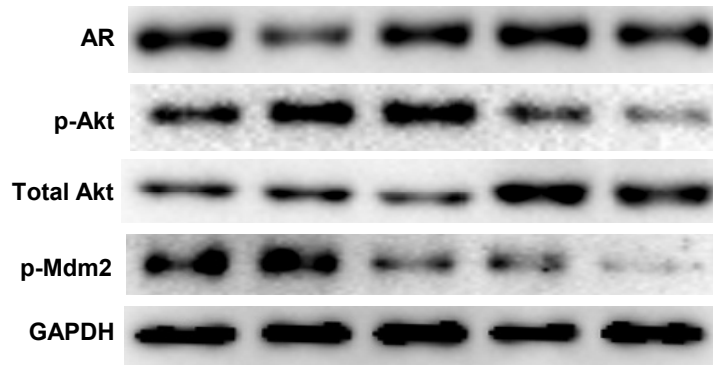

Supplement: mmc6.pdf [file mmc6.pdf]

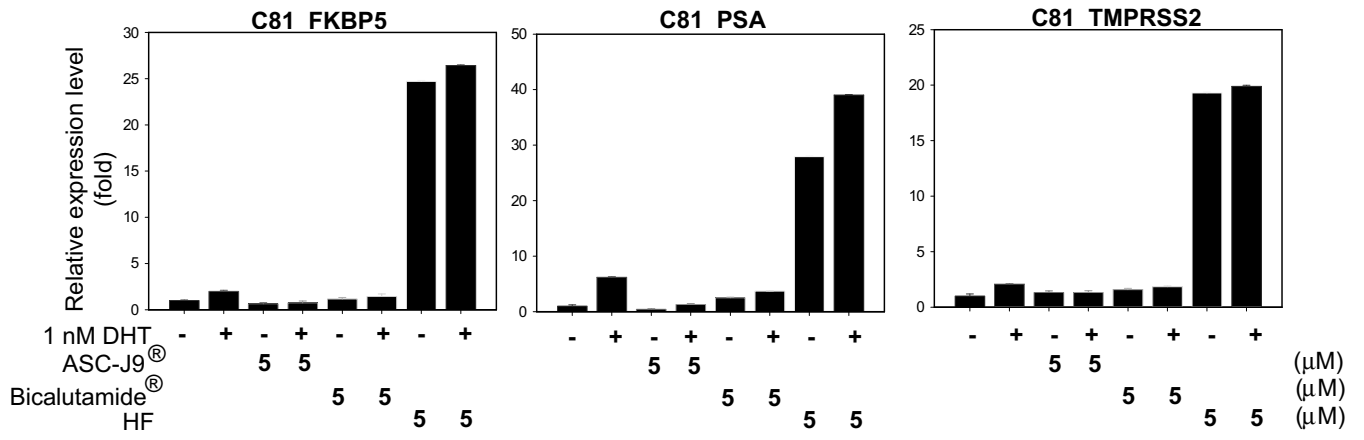

Supplement: mmc7.pdf [file mmc7.pdf]

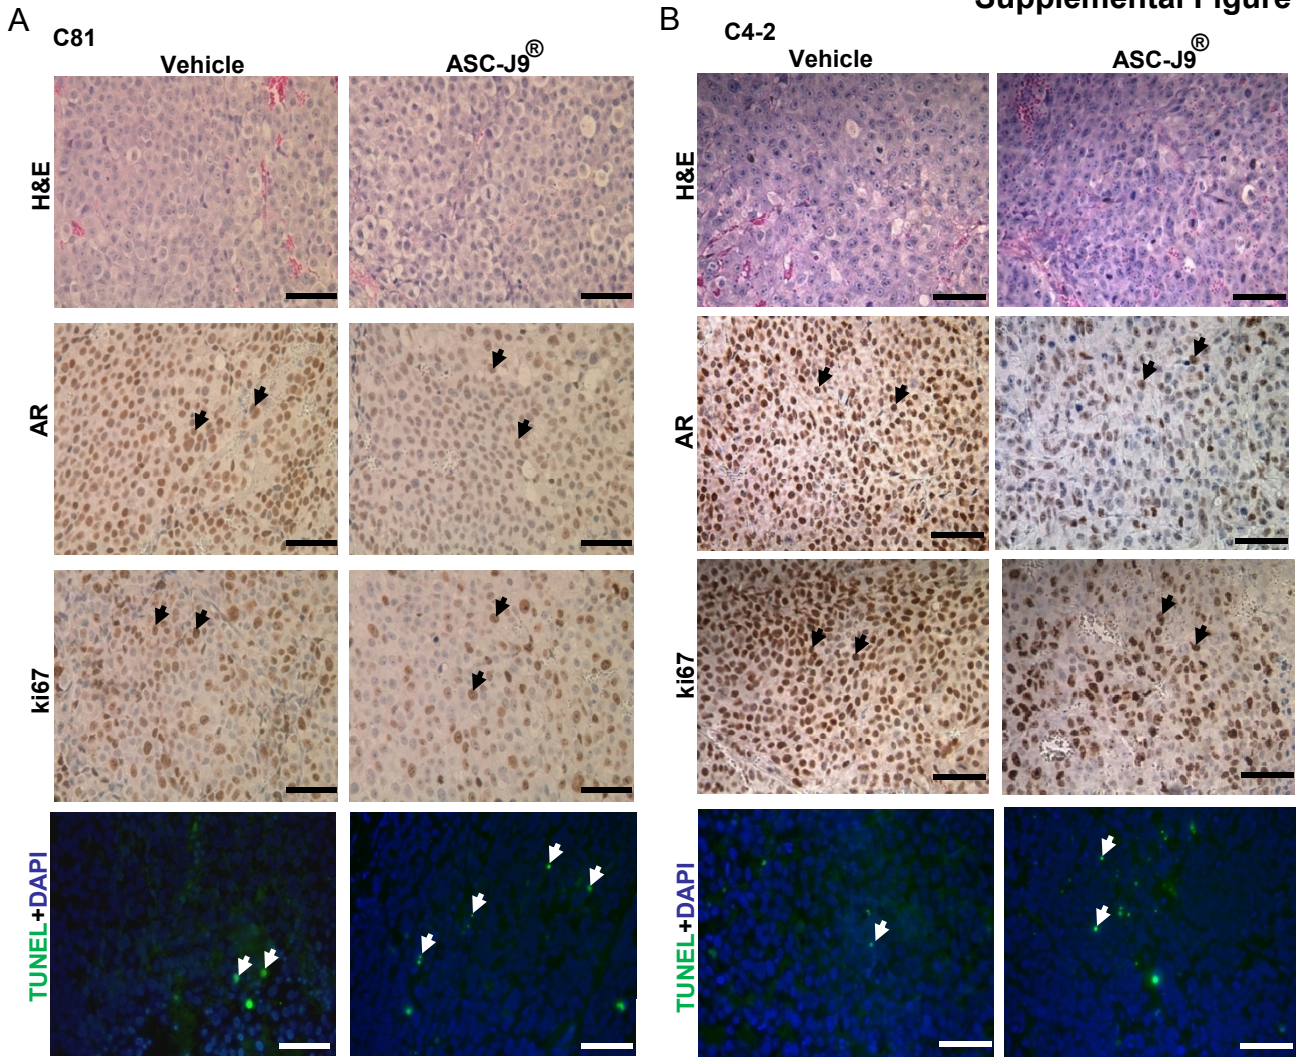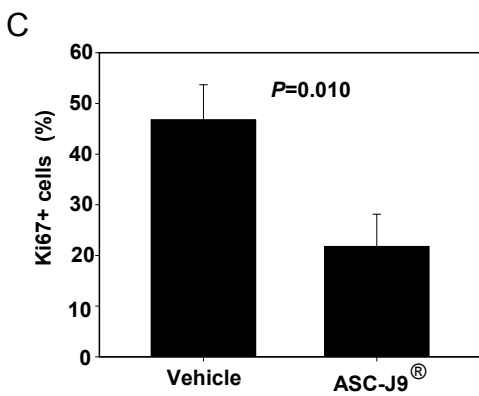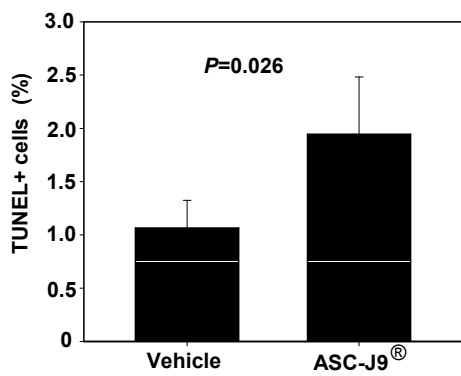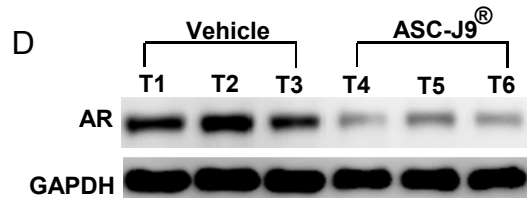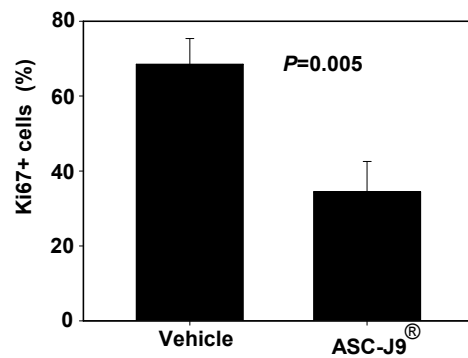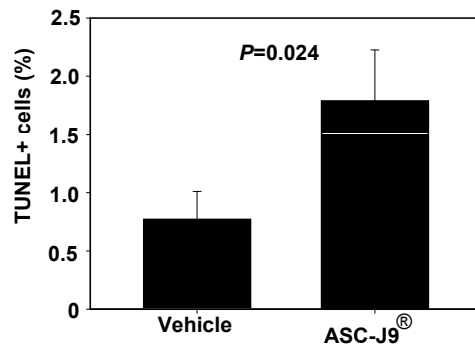

Supplement: mmc8.pdf [file mmc8.pdf]

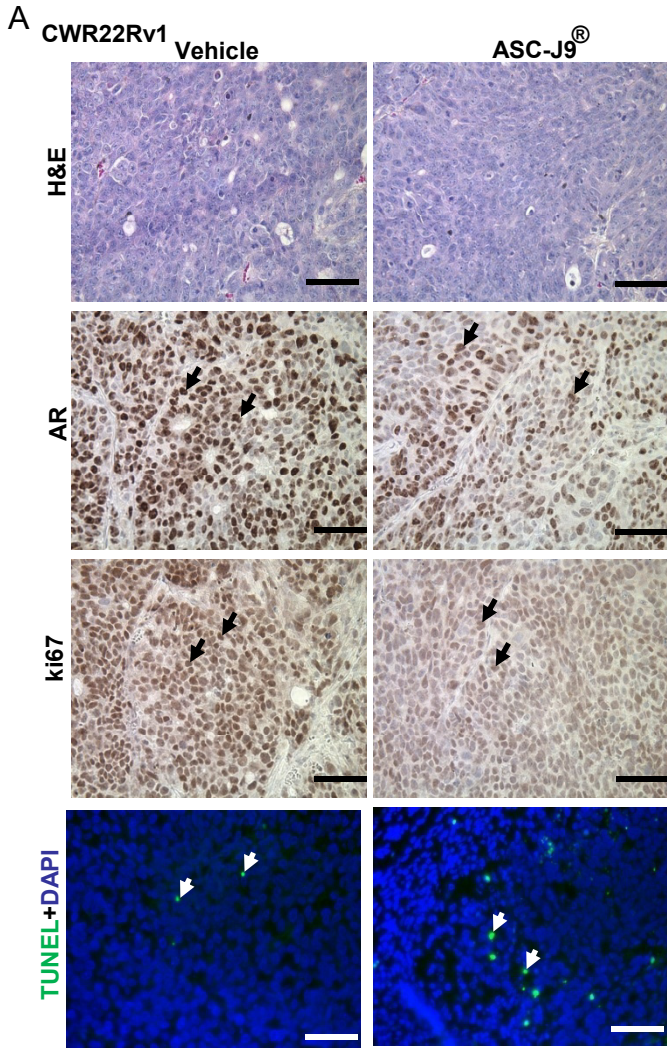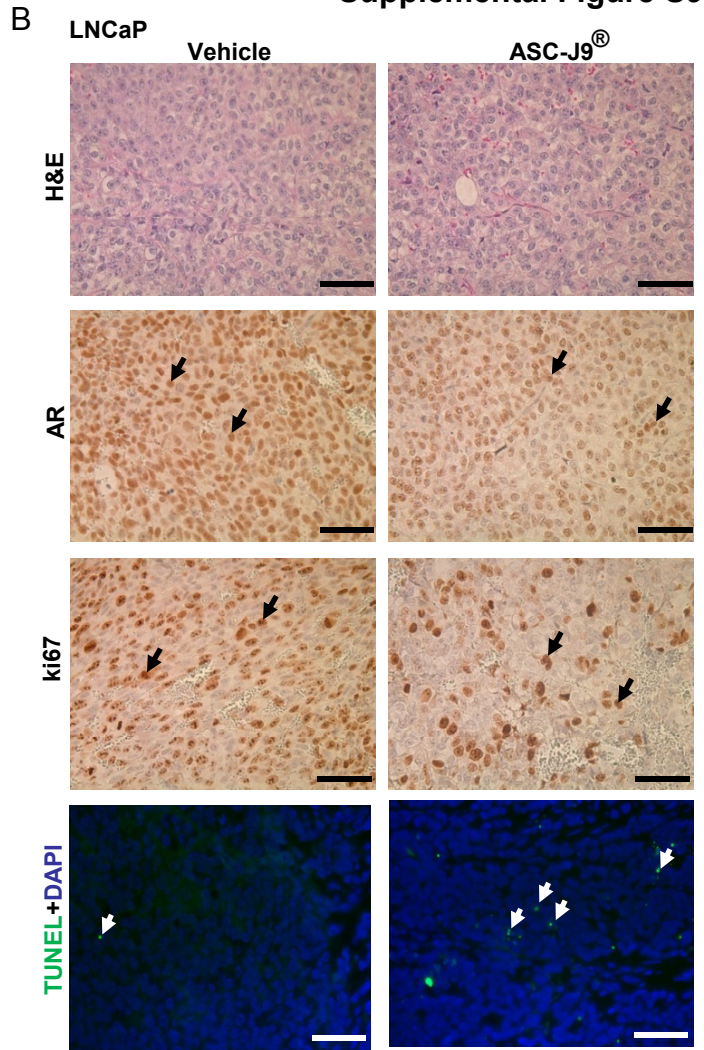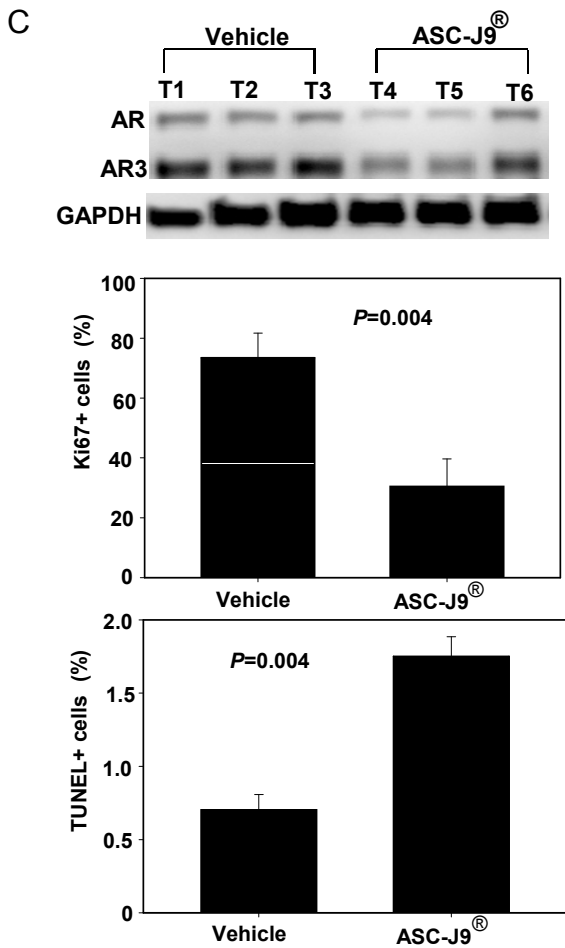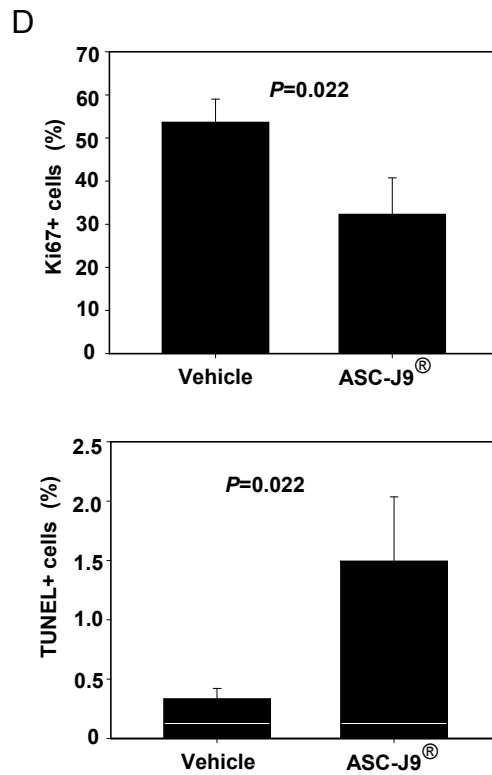

Supplement: mmc9.pdf [file mmc9.pdf]
